# Supplementary material for: Synthesis of tetrahedron DNA nanostructures for detecting the activation of cell signal transduction via their specific binding to transcriptional factors
Source: Royal Society of Chemistry journal article supplement (doi:10.1039/d2nr01954j), 2022-01-01
Supplement: d2nr01954j1.pdf [file d2nr01954j1.pdf]

1

## Supporting Information

# 2 **Synthesis of Tetrahedron DNA Nanostructures for Detecting** 3 **the Activation of Cell Signal Transduction via Specifically** 4 **Binding to Transcriptional Factors**

5

6 Ying Zhang<sup>a</sup>, Yue Chen<sup>a</sup>, Bing Wu<sup>a</sup>, Danqing Liu<sup>a</sup>, Lengxi Fu<sup>a</sup>, Fei Huang<sup>a\*</sup>

7

8 <sup>a</sup>Central Laboratory, Fujian Key Laboratory of Precision Medicine for Cancer, Key  
9 Laboratory of Radiation Biology of Fujian Higher Education Institutions, The First  
10 Affiliated Hospital, Fujian Medical University, Fuzhou, Fujian, 350005, China.

11

12 \*Corresponding author:

13 Fei Huang, PhD

14 Central Lab,

15 First Affiliated Hospital of Fujian Medical University,

16 No.20, Chazhong Road, Taijiang District, Fuzhou, 350005

17 China

18 Tel.: 86-591-87981768

19 Fax: 86-591-87981028

20 Email: [feifeigood2148@126.com](mailto:feifeigood2148@126.com)

21

22

1 **Table S1** Oligonucleotide sequences and modifications.

| Name                                     | Sequences (5'-3')                                                                                                    |
|------------------------------------------|----------------------------------------------------------------------------------------------------------------------|
|                                          | <b>FAM-</b>                                                                                                          |
| TA                                       | <u>ACACGCTCACGACCACGACCACGAACACGCACTACCA</u><br>CTTTTTTACATTCCTAAGTCTGAAACATTACAGCTTGC<br>TACACGAGAAGAGCCGCCATAGTA   |
| TB                                       | TATCACCAGGCAGTTGACAGTGTAGCAAGCTGTAATA<br>GATGCGAGGGTCCAATAC                                                          |
| TC                                       | TCAACTGCCTGGTGATAAAAACGACACTACGTGGGAAT<br>CTACTATGGCGGCTCTTC                                                         |
| TD                                       | TTCAGACTTAGGAATGTGCTTCCCACGTAGTGTGCTTT<br>GTATTGGACCCTCGCAT                                                          |
| cDNA                                     | GCGTGTTTCGTGGTTCGTGGTTCGTGAGCGTGT                                                                                    |
| Displacement<br>strands (BHQ1)           | AGTGGTAGTTCGTGGTTCGTGGTTCGTGGTTCGTGAGCGTG<br><b>T-BHQ1</b>                                                           |
|                                          | <b>FAM-</b>                                                                                                          |
| TA-Smads                                 | <u>TCTGTCTGTCTGTCTGTCTGTCTGTCTGTCTGACTACCA</u><br>CTTTTTTACATTCCTAAGTCTGAAACATTACAGCTTGC<br>TACACGAGAAGAGCCGCCATAGTA |
| cD-Smads                                 | CAGACAGACAGACAGACAGACAGACAGACAGACAGA                                                                                 |
| Displacement<br>strands (BHQ1-<br>Smads) | AGTGGTAGTCAGACAGACAGACAGACAGACAGACAG<br>ACAGA- <b>BHQ1</b>                                                           |

2 1. FAM-labeled TDNs for hypoxia transcriptional factor  $\alpha$  (HIF-1 $\alpha$ ) consisted of TA, TB,  
3 TC, TD, cDNA. The breaklined sequence in TA could hybridize to cDNA, which was the bind  
4 motif to HIF-1 $\alpha$ .

5 2. FAM-labeled TDNs for TGF- $\beta$  signaling consisted of TA-Smads, TB, TC, TD, cD-Smads.  
6 The underlined sequence in TA-Smads could hybridize to cD-Smads, which was the bind  
7 motif to Smads.

8

1 **Figure S1**

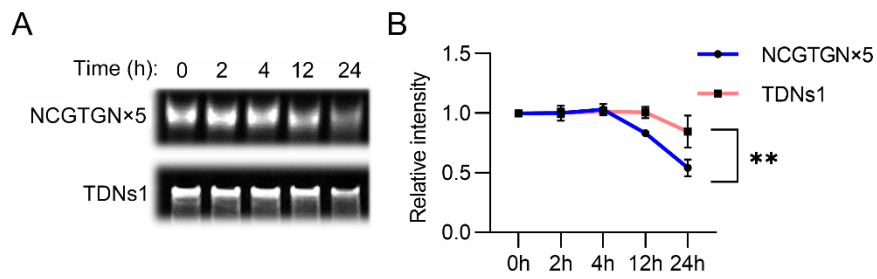

2

3 **Figure S1** The stability of TDNs. (A) TDNs1 and NCGTGN x5 double strands were  
4 treated with 10% FBS-containing medium for the indicated time. Then DNAs (2  $\mu$ M)  
5 were harvested and subjected to PAGE (12%). (B) The band intensity of DNAs in (A)  
6 was normalized to the time point 0h and the curves were drawn.  $**P < 0.01$

7

8

1 **Figure S2**

2

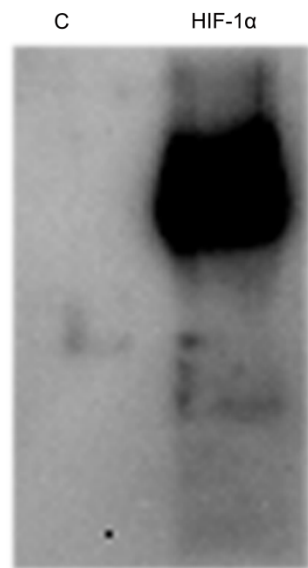

3

4 **Figure S2** The purified HIF-1 $\alpha$  protein was harvested and subjected to immunoblotting.

5

6

7

1 **Figure S3**

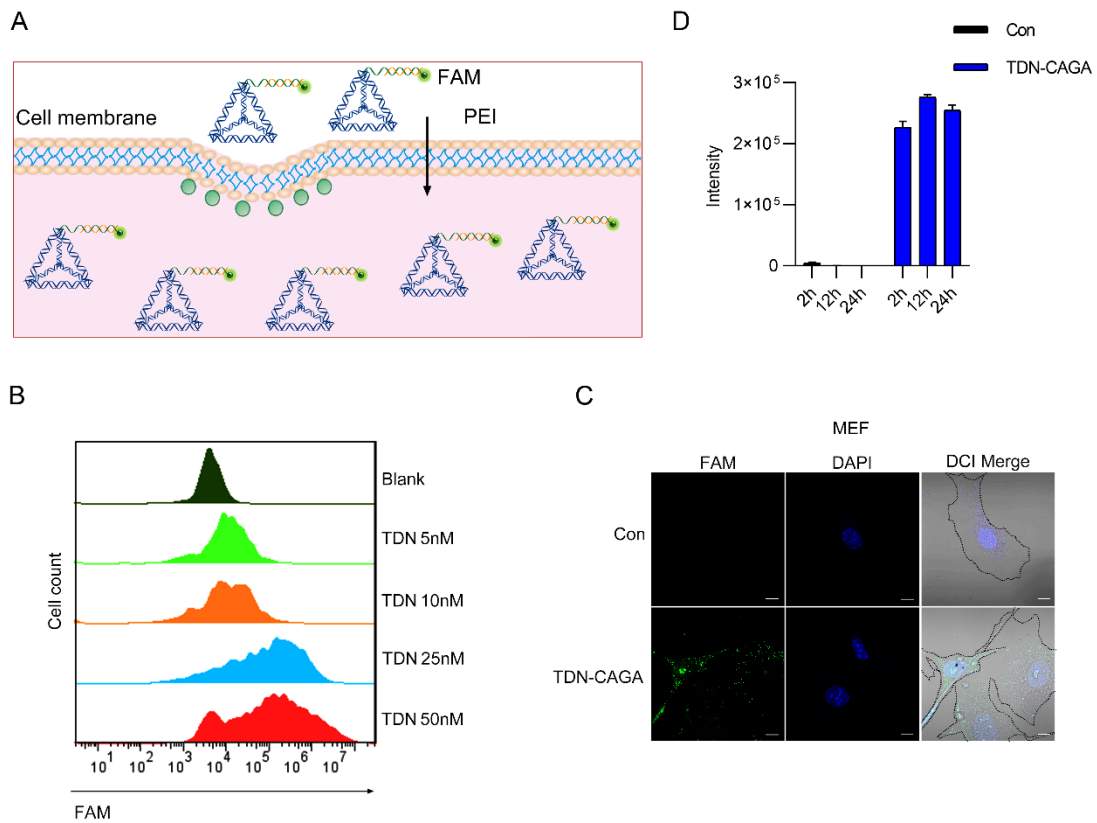

2

3 **Figure S3.** TDNs could be transfected into cells. (A) Graph shows that TDNs could be  
 4 transfected in to cells via PEI. (B) The flow cytometry analysis of MEF cells incubated  
 5 with 0 nM, 5 nM, 10 nM, 25 nM and 50 nM TDNs. (C) Confocal microscopic images  
 6 of MEF cells 24 h after TDNs were transfected. The nucleus was stained with DAPI  
 7 (blue). TDN positive particles (green). Scale bar: 10  $\mu$ m. (D) The fluorescence intensity  
 8 of FAM-labeled TDNs in MEF cells detected by the fluorescence spectrometer 2 h, 12  
 9 h and 24 h after the transfection reagents were depleted.

10

# 1 Figure S4

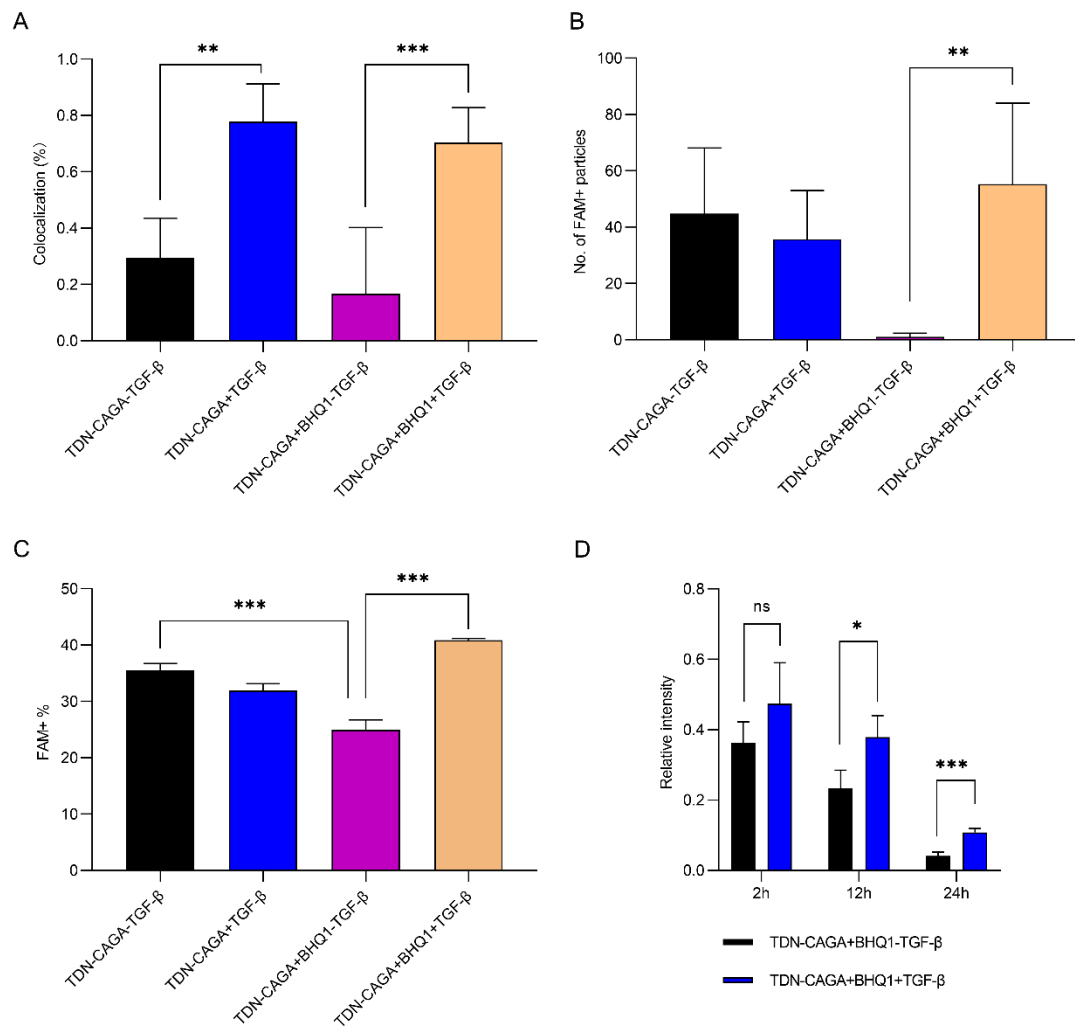

2

3 **Figure S4.** TGF-β signaling pathway activity examined by TDNs. (A) Statistical FAM  
 4 positive particles comparison of individual cells in Figure 5(B) (error bars represent  
 5 SD). \*\* indicates  $P < 0.01$ . (B) Statistical colocalization percentages of FAM positive  
 6 particles with Smad2/3 of individual cells in Figure 5(B) (error bars represent SD). \*\*  
 7 indicates  $P < 0.01$ , \*\*\* indicates  $P < 0.001$ . (C) Statistical FAM positive cells  
 8 percentage in each group of Figure 5(C) (error bars represent SD). \*\*\* indicates  $P$   
 9  $< 0.001$ . (D) The fluorescence intensity of FAM-labeled TDNs2 in MEF cells incubated  
 10 with TGF-β ligands or control vesicles for 2 h was detected. BHQ1-labeled

1 displacement strands were hybridized with TDNs within cells for 2 h, 12 h and 24 h.  
2 The fluorescence intensity of each group was normalized with the fluorescence  
3 intensity before hybridization. (error bars represent SD). \* indicates  $P < 0.05$ , \*\*\*  
4 indicates  $P < 0.001$ .  
5

## 1 Figure S5

A

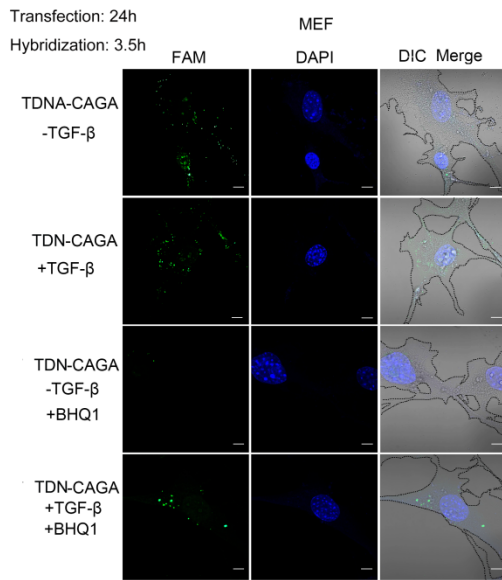

B

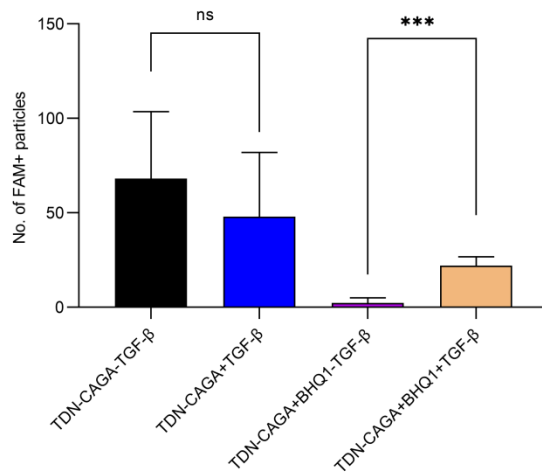

2

3 **Figure S5** TGF- $\beta$  signaling activity examined by TDNs2. (A) Confocal microscopic  
4 images of TDNs2 transfected MEF cells incubated with TGF- $\beta$  ligands or control  
5 vesicles for 2 h. BHQ1-labeled displacement strands were hybridized with TDNs2  
6 within cells for 3.5 h. The nucleus was stained with DAPI (blue). Scale bar: 10  $\mu$ m. (B)  
7 Statistical FAM positive particles comparison of individual cells in (A) (error bars  
8 represent SD). \*\*\* indicates  $P < 0.001$ .
